# Supplementary material
Source: PubMed Central journal article supplement (PMC4303333)
Supplement: tx500444e_si_001.pdf [file tx500444e_si_001.pdf]

## SUPPORTING INFORMATION

### Survey of Human Oxidoreductases and Cytochrome P450 Enzymes Involved in the Metabolism of Xenobiotic and Natural Chemicals

Slobodan Rendic and F. Peter Guengerich

University of Zagreb

Vanderbilt University School of Medicine

#### Notes regarding databases

1. The first row in the Excel formats is the title (not counted).
2. Racemates and enantiomeric compounds, (*S*)- and (*R*), optical isomers (+)-, (-)-, etc. are counted as a single compound (entity), as we are not examining the differences when the same reaction is going on.
3. Some groups of chemicals, undergoing the same reaction(s), are listed as a single compound (entity); e.g. fatty acids (long chains or short chains), lipids, derivatives of a particular chemical(s), e.g. *N,N*-dialkylnitrosamines (bulky, long, and short chains).
4. Compounds originating from physiological/natural compounds but used as drugs (i.e. testosterone and other steroids) are included under physiological compounds.
5. Drugs/compound metabolites participating in further metabolism are counted as separate compounds.

**List of all compounds**

(-)-Camphor

(-)-Deprenyl, (R)-(-)-Selegiline

(-)-Fenchone

(-)-OSU6162

(-)-Rhazinilam

(-)-Verbenone

(+) -Carvone

(+) -Fenchone

(+) -S-145

(+) -S-145, bisnor-

(+) -S-145, tetranor-

(+, -) -Flavanone

(2-Naphthyl)hydrazine

(4-Bromophenyl)-1,3-oxathiolane

(S)- and (R)-Nordeprenyl tetrahydropyridylcarbamate

(Z)-N-Ac-FFVC

[13C4,15N]-Midazolam

[18F]-FCWAY

|                                                     |
|-----------------------------------------------------|
| 1-(1-Propynyl)pyrene                                |
| 1-(2-Pyrimidinyl)-piperazine                        |
| 1-(3-Trifluoromethylphenyl)piperazine, TFMPP        |
| 1-(4-Methoxyphenyl)piperazine, MeOPP                |
| 1,1,1-Trichloroethane                               |
| 1,1,2,2-Tetrafluoro-1-(2,2,2-trifluoroethoxy)ethane |
| 1,1,2-Trichloroethane                               |
| 1,1-Dichloroethylene, Vinylidene chloride           |
| 1,2,3,4,5-Pentachlorobenzene                        |
| 1,2,3,5-Tetrachlorobenzene                          |
| 1,2,4-Trichlorobenzene                              |
| 1,2,4-Trimethylbenzene                              |
| 1,2-Dibromoethane, Ethylene dibromide               |
| 1,2-Dichlorobenzene                                 |
| 1,2-Dichloroethane, Ethylene dichloride             |
| 1,2-Dichloropropane, Propylene dichloride           |
| 1,3-Butadiene                                       |
| 1,3-Dinitropyrene                                   |
| 1,4-Cineole                                         |
| 1,4-Dichlorobenzene                                 |

|                                               |
|-----------------------------------------------|
| 1,4-Dimethylbenzo[c]phenanthrene              |
| 1,6-Dinitropyrene                             |
| 1,8-Cineole, Eucalyptol                       |
| 1,8-Dinitropyrene                             |
| 10-Acetyldocetaxel                            |
| 10-Deacetylpaclitaxel                         |
| 10-Hydroxycamptothecin                        |
| 11,9-Epoxyethano-PGH2, U-46619                |
| 11-Deoxycorticosterone, Cortexone             |
| 11-Deoxycortisol                              |
| 11-Hydroxystearate                            |
| 12,13-DiOME                                   |
| 12-Ethoxy-fagaronine                          |
| 12-Hydroxyeicosatetraenoic acid, 12-HETE      |
| 12-Hydroxyoleate                              |
| 12-Hydroxystearate                            |
| 13(S)-Prostaglandin H2, PGH2                  |
| 13,14-Dihydroretinoic acid                    |
| 15-Hydroperoxyeicosatetraenoic acid, 15-HPETE |
| 15-Hydroxyeicosatetraenoic acid, 15-HETE      |

|                                                     |
|-----------------------------------------------------|
| 15-keto-Prostaglandin H2                            |
| 17-Allylamino-17-demethoxygeldanamycin, 17-AAG      |
| 17alpha-Methyltestosterone                          |
| 18-Hydroxycorticosterone                            |
| 18-Methoxycoronaridine                              |
| 19-Bromoandrost-1,4,6-triene-3,17-dione 10c         |
| 19-Bromoandrost-1,4-diene-3,17-dione 8c             |
| 19-Bromoandrost-4,6-diene-3,17-dione 9c             |
| 19-Bromoandrost-4-ene-3,17-dione 7c                 |
| 19-Chloroandrost-1,4,6-triene-3,17-dione 10b        |
| 19-Chloroandrost-1,4-diene-3,17-dione 8b            |
| 19-Chloroandrost-4,6-diene-3,17-dione 9b            |
| 19-Chloroandrost-4-ene-3,17-dione 7b                |
| 19-Hydroxy-4beta,5beta-epoxy-androstane-3,17-dione  |
| 19-Hydroxy-6alpha-methylandrost-4-ene-3,17-dione 13 |
| 19-Hydroxy-6beta-methylandrost-4-ene-3,17-dione 12  |
| 19-Hydroxy-6-oxoandrostenedione                     |
| 19-Iodoandrost-1,4,6-triene-3,17-dione 10d          |
| 19-Iodoandrost-1,4-ene-3,17-dione 8d                |
| 19-Iodoandrost-4,6-ene-3,17-dione 9d                |

|                                                     |
|-----------------------------------------------------|
| 19-Iodoandrost-4-ene-3,17-dione 7d                  |
| 19-nor-Androst-4-ene-3,17-dione, Norandrostenedione |
| 19-Oxo-4beta,5beta-epoxy-androstane-3,17-dione      |
| 19-Oxo-6alpha-methylandrost-4-ene-3,17-dione 15     |
| 19-Oxo-6beta-methylandrost-4-ene-3,17-dione 14      |
| 19-Oxo-androst-4-ene-3,17-dione                     |
| 1-Acenaphthenol                                     |
| 1-Allyl-4-methylpyrol-1,2,3,6-tetrahydropyridine    |
| 1alpha,24(R)-dihydroxyvitamin D3                    |
| 1alpha,24-Dihydroxyvitamin D2                       |
| 1alpha,25-Dihydroxy-19-nor-vitamin D3               |
| 1alpha,25-Dihydroxy-20epi-vitamin D3                |
| 1alpha,25-Dihydroxy-3-epi-vitamin D3                |
| 1alpha,25-Dihydroxyvitamin D2                       |
| 1alpha,25-Dihydroxyvitamin D3, Calcitriol           |
| 1alpha-Hydroxydihydrotachysterol3                   |
| 1alpha-Hydroxyvitamin D2                            |
| 1alpha-Hydroxyvitamin D3, Alfacalcidol              |
| 1-Amino-4-phenyl-1,2,3,6-tetrahydropyridine, APTP   |
| 1-Aminobenzotriazole, 1-ABT                         |

|                                                        |
|--------------------------------------------------------|
| 1-Aminopyrene                                          |
| 1-Azabenz[a]pyrene, 10-azaB[a]P                        |
| 1beta,25-Dihydroxy-3-epi-vitamin D3                    |
| 1beta,25-Dihydroxy-vitamin D3                          |
| 1-Chlorohexane                                         |
| 1-Cyano-3-(3,4-xylyl)guanidine                         |
| 1-Cyanomethyl-4-methylpyrol-1,2,3,6-tetrahydropyridine |
| 1-Cylopropyl-4-aryl-2-1,2,3,6-tetrahydropyridines      |
| 1-Ethylpyrene                                          |
| 1-Ethynylpyrene                                        |
| 1-Isopropyl-4-methylpyrol-2-1,2,3,6-tetrahydropyridine |
| 1-Methyl-4-aryl-2-1,2,3,6-tetrahydropyridines          |
| 1-Methyl-4-methylpyrol-1,2,3,6-tetrahydropyridine      |
| 1-Methyl-4-phenyl-1,2,3,6-tetrahydropyridine, MPTP     |
| 1-Methylhistamine, N-tele-methylhistamine              |
| 1-Methyl-N-4-aryloxy-1,2,3,6-tetrahydropyridine        |
| 1-Methylpyrene                                         |
| 1-Monochlorodibenzo-p-dioxin, 1-MCDD                   |
| 1-Naphthol                                             |
| 1-Nitropyrene                                          |

|                                                             |
|-------------------------------------------------------------|
| 1-Phenylazo-2-hydroxynaphthol, Sudan I                      |
| 1-Propargyl-4-methylpyrol-1,2,3,6-tetrahydropyridine        |
| 1-Propargyl-4-phenyl-1,2,3,6-tetrahydropyridine             |
| 2-(4-Amino-3-methylphenyl)-5,6-difluorobenzothiazole        |
| 2-(4-Amino-3-methylphenyl)-5-fluorobenzothiazole, 5F-203    |
| 2-(4-Amino-3-methylphenyl)-6-fluorobenzothiazole, 6F-203    |
| 2-(4-Amino-3-methylphenyl)benzothiazole, DF 203, NSC 674495 |
| 2-(4-Amino-3-methylphenyl)benzothiazole, DF 203, NSC 674495 |
| 2,2',4',5,5'-Pentachlorobiphenyl, PCB 101                   |
| 2,2,4,6,6-d5-Testosterone                                   |
| 2,2,6,6-Tetramethylpiperidine I                             |
| 2,2,6,6-Tetramethylpiperidine II                            |
| 2,2,6,6-Tetramethylpiperidine III                           |
| 2,2-Dichloro-1,1,1-trifluoroethane, HCFC-123                |
| 2,3,4,5,6-Pentachlorophenol                                 |
| 2,3,7-Trichlorodibenzo-p-dioxin, 2,3,7-triCDD               |
| 2,3-Diaminopyridine derivs.                                 |
| 2,3-Dichlorobutane                                          |
| 2,3-Dichlorodibenzo-p-dioxin, 2,3-DCDD                      |
| 2,4,3',5'-Tetramethoxystilbene, TMS                         |

|                                                 |
|-------------------------------------------------|
| 2,4,5,2',4',5'-Hexachlorobiphenyl, PCB 153      |
| 2,4-Dichlorophenol                              |
| 2,4-Dichlorophenoxyacetic acid                  |
| 2,6-Dichlorobenzonitrile, Dichlobenil           |
| 2,6-Dichlorophenyl methylsulfone                |
| 2,6-Dimethylaniline                             |
| 2,7-Dichlorodibenzo-p-dioxin, 2,7-DCDD          |
| 2-[2-{(2,6-Dichlorophenyl)amino}]phenyl ethanol |
| 20(S)-; 20(R)-Hydroxycholesterol                |
| 20alpha,22(R)-Dihydroxycholesterol              |
| 20alpha-Hydroxycholesterol                      |
| 20-Hydroxy-leukotriene B4, 20-hydroxy-LTB4      |
| 22(S)-; 22(R)-Hydroxycholesterol                |
| 23(S),25,26-Trihydroxyvitamin D3                |
| 24(R),25-Dihydroxyvitamin D3                    |
| 24-; 24(S)-Hydroxycholesterol                   |
| 24alpha-Methylcholesterol                       |
| 24beta-Ethylcholesterol                         |
| 24-Hydroxy-4-cholesten-3-one                    |
| 24-Ketocholesterol                              |

|                                                           |
|-----------------------------------------------------------|
| 24-Oxo-,25-hydroxyvitamin D3                              |
| 25-Hydroxy-19-nor-vitamin D3                              |
| 25-Hydroxy-3-epi-vitamin D3                               |
| 25-Hydroxy-4-cholesten-3-one                              |
| 25-Hydroxycholesterol                                     |
| 25-Hydroxyvitamin D3, Calcifediol                         |
| 25-Hydroxyvitamin D3-26,23-lactol                         |
| 26(R)-Hydroxy-cholesterol                                 |
| 26,27-Hexafluoro-1alpha,23(S),25-trihydroxyvitamin D3     |
| 26,27-Hexafluoro-1alpha,25-dihydroxyvitamin D3            |
| 26S-Hydroxy-cholesterol                                   |
| 27-Hydroxycholesterol                                     |
| 2-Acetylaminofluorene, 2-AAF                              |
| 2alpha-methyl-19-ol-androst-4-ene-3,17-dione 26           |
| 2alpha-methyl-19-one-androst-4-ene-3,17-dione 28          |
| 2alpha-methyl-androst-4-ene-3,17-dione 6                  |
| 2-Amino-1-methyl-6-phenylimidazo[4,5-b]pyridine, PhIP     |
| 2-Amino-3,4-dimethylimidazo[4,5-f]quinoline, MeIQ         |
| 2-Amino-3-methylimidazo[4,5-f]quinoline, IQ               |
| 2-Amino-6-methyldipyrido[1,2-a:3,2'-d]-imidazole, Glu-P-1 |

|                                                  |
|--------------------------------------------------|
| 2-Amino-alpha-carboline                          |
| 2-Aminoanthracene, 2-AA                          |
| 2-Aminodipyrido[1,2-a:3,2'-d]-imidazole, Glu-P-2 |
| 2-Aminofluorene, 2-AF                            |
| 2-Aroylthiophene deriv. 1                        |
| 2-Aroylthiophene deriv. 2                        |
| 2-Aroylthiophene deriv. 2a                       |
| 2-Aroylthiophene deriv. 2b                       |
| 2-Aroylthiophene deriv. 3, TPP                   |
| 2-Aroylthiophene deriv. 4                        |
| 2-Aroylthiophene deriv. 5                        |
| 2-Aroylthiophene deriv. 6, TPE                   |
| 2-Aroylthiophene deriv. 7                        |
| 2-Aroylthiophene deriv. 8                        |
| 2-Aroylthiophene deriv. 9                        |
| 2beta-methyl-androst-4-ene-3,17-dione 5          |
| 2C-B                                             |
| 2C-D                                             |
| 2C-E                                             |
| 2-Chloro-1,1-difluoroethene                      |

|                                           |
|-------------------------------------------|
| 2C-I                                      |
| 2C-T-2                                    |
| 2C-T-7                                    |
| 2-Heptenal                                |
| 2-Hexenal                                 |
| 2-Hydroxypalmitate                        |
| 2-Hydroxystearate                         |
| 2-Isopropenyl-2-methyladamantane, 2-PMADA |
| 2'-Methoxyacetophenone                    |
| 2-Methoxyamphetamine                      |
| 2-Methoxyphenamine                        |
| 2-Methyl-1,3-benzodithiole                |
| 2-Methylene-androst-4-ene-3,17-dione 17   |
| 2-Monochlorodibenzo-p-dioxin, 2-MCDD      |
| 2-Naphthol                                |
| 2-Naphthyl methyl sulfide                 |
| 2-Naphthylamine, beta-NA                  |
| 2-Nitroanisole                            |
| 2-Nitronaphthalene                        |
| 2-Nitropyrene                             |

|                                                                                |
|--------------------------------------------------------------------------------|
| 2-Nonanol                                                                      |
| 2-Nonenal                                                                      |
| 2n-Propylquinoline                                                             |
| 2-Octenal                                                                      |
| 2-Pentenal                                                                     |
| 2-Phenylbenzotriazoles, 4-amino deriv.                                         |
| 2-Phenylethylamine, beta-Phenylethylamine                                      |
| 2-Phenylthiophene                                                              |
| 3-(N-nitrosomethylamino)propionaldehyde, NMPA                                  |
| 3-(N-nitrosomethylamino)propionaldehyde, NMPA                                  |
| 3-(N-nitrosomethylamino)propionitrile, NMPN                                    |
| 3-(N-phenylamino)propane-1,2-diol, PAP                                         |
| 3,3'-Diindolylmethane                                                          |
| 3,3-Tetramethyleneglutarimides                                                 |
| 3',4'-Dimethoxyflavone                                                         |
| 3,4-Dimethoxyphenyldiaziridine 1c                                              |
| 3,4-Methylenedioxyamphetamine N-propyl, MDA N-propyl                           |
| 3,4-Methylenedioxyamphetamine, Love pills, MDA                                 |
| 3,4-Methylenedioxyethylamphetamine (R,S)-, Eve, MDE                            |
| 3,4-Methylenedioxymethamphetamine, Ecstasy, MDMA; MDMA (R)-(-)-; MDMA (S)-(+)- |

|                                                       |
|-------------------------------------------------------|
| 3,5,7-Trihydroxyflavone, Galangin                     |
| 3,5-Dihydroxy-4'-methoxystilbene, Desoxyrhapontigenin |
| 3-[(Arylthio)-ethyl]sydnone, TTMS                     |
| 3-[2-(2,6-Dichlorophenyl)amino]benzyloxy]propan-1-ol  |
| 3-[2,3-Dichloro-4-(2-thenoyl)phenoxy] propan-1-ol     |
| 3-Acetylaminoanthrone, 3-Ac-ABA                       |
| 3-Amino-1,4-dimethyl-5H-pyrido[4,3-b]indole, Trp-P-1  |
| 3-Amino-1-methyl-5H-pyrido[4,3-b]indole, Trp-P-2      |
| 3-Aminobenzanthrone, 3-ABA                            |
| 3beta-Hydroxy-5-beta-pregnan-20-one                   |
| 3beta-Hydroxy-5-cholestenal                           |
| 3beta-Hydroxy-5-cholestenoic acid                     |
| 3beta-Hydroxylanost-7-en-32-ol                        |
| 3-Butene-1,2-diol                                     |
| 3-Butyryl-7-methoxycoumarin, BMC                      |
| 3-Cyano-7-ethoxycoumarin, CEC                         |
| 3-Deoxy-androst-4-ene-3,17-dione                      |
| 3-Hydroxyphenethylamine                               |
| 3-Isporenyl-3-methyldiamantane, 3-PMDIA               |
| 3-Methoxy-4-aminoazobenzene, 3-MeO-AAB                |

|                                                     |
|-----------------------------------------------------|
| 3-Methoxymorphinan                                  |
| 3-Methoxyphenethylamine                             |
| 3-Methoxyphenyldiaziridine 7                        |
| 3-Methyl-4-methoxyphenyldiaziridine 1e              |
| 3-Methylcholanthrene, 3MC                           |
| 3-Methylindole, Skatole                             |
| 3-Nitrobenzanthrone, 3-NBA                          |
| 3-Nitrofluoranthene                                 |
| 3-N-nitrosoguvacoline, NG                           |
| 3-O-methylfluorescein                               |
| 4-(Methylnitrosamino)-1-(3-pyridyl)-1-butanol, NNAL |
| 4-(Methylnitrosamino)-1-(3-pyridyl)-1-butanone, NNK |
| 4-(N,N-diethylaminomethyl)-7-benzyloxycoumarin      |
| 4-(N,N-diethylaminomethyl)-7-methoxycoumarin        |
| 4-(N,N-diethylaminomethyl)-7-propoxycoumarin        |
| 4-(N,N-dimethylaminomethyl)-7-ethoxycoumarin        |
| 4,4-Dimethylpiperidine-2,6-diones                   |
| 4,4'-Methylene bis(2-chloroaniline), MOCA           |
| 4',5'-Dihydro-8-methoxypsoralen                     |
| 4,5-Methylenephenanthrene                           |

|                                                  |
|--------------------------------------------------|
| 4,7,10,13,16-(Z)-Docosapentaenoic acid           |
| 4,7,10,13,16,19-(Z)-Docosahexaenoic acid         |
| 4-[N-tert-Butyl)aminomethyl]-7-methoxycoumarin   |
| 480156-S                                         |
| 4-Aminobiphenyl                                  |
| 4-Androstene-3,6,17-trione                       |
| 4beta,5beta-Epoxy-androstane-3,17-dione          |
| 4beta-Hydroxycholesterol                         |
| 4-Biphenylaldehyde                               |
| 4-Chloroindole                                   |
| 4-Chloromethyl-7-ethoxycoumarin                  |
| 4-Chlorophenyldiaziridine 8                      |
| 4-Cholesten C7alpha-hydroxy-3-one                |
| 4-Cholesten-3-one                                |
| 4-Ethoxyphenyldiaziridine 1b                     |
| 4-ethylDDC, DDEP                                 |
| 4-Hydroxyphenethylamine                          |
| 4-Hydroxy-trans-2-nonenal                        |
| 4-Ipomeanol                                      |
| 4'-Methoxy-alpha-pyrrolidinopropiophenone, MOPPP |

|                                                |
|------------------------------------------------|
| 4-Methoxyamphetamine, para-Methoxyamphetamine  |
| 4'-Methoxyflavanone                            |
| 4-Methoxymethamphetamine                       |
| 4-Methoxy-N-(n-butyl)amphetamine               |
| 4-Methoxy-N-ethyl-amphetamine                  |
| 4-Methoxyphenethylamine                        |
| 4-Methoxyphenyldiaziridine 1a                  |
| 4-Methoxyphenylketone 10                       |
| 4'-Methyl-alpha-pyrrolidinobutyrophenone, MPBP |
| 4'-Methyl-alpha-pyrrolidinopropiophenone, MPPP |
| 4-Methylaminoantipyrine                        |
| 4-Methylphenol, p-Cresol                       |
| 4-Methylthio-amphetamine                       |
| 4-Methylthiophenyldiaziridine 1d               |
| 4-Nitroanisole                                 |
| 4-Nitropyrene                                  |
| 4-Nonylphenol                                  |
| 4-Nonylphenol                                  |
| 4-O-Bzl-indole                                 |
| 4-Vinyl-1-cyclohexene (S)- and (R)-            |

|                                                  |
|--------------------------------------------------|
| 5,24-Cholestadien-3beta-ol                       |
| 5,4'-Dihydroxy-3-methoxystilbene                 |
| 5,4'-Dimethoxyisoflavone                         |
| 5,6-Dimethylxanthenone-4-acetic acid, DMXAA      |
| 5,7,4'-Trimethoxyflavone                         |
| 5,7-Dimethoxyflavone                             |
| 5,9-Dimethyldibenzo[c,g]carbazole, diMeDBC       |
| 58C80                                            |
| 5alpha-Androstane-3,17-dione 5                   |
| 5alpha-Androstane-3alpha,17beta-diol             |
| 5alpha-Androstane-3beta,17beta-diol              |
| 5alpha-Dihydroprogesterone                       |
| 5alpha-Dihydrotestosterone, DHT                  |
| 5-AOT                                            |
| 5beta-Cholestane-3alpha,7alpha,12alpha,27-tetrol |
| 5beta-Cholestane-3alpha,7alpha,12alpha-triol     |
| 5beta-Cholestane-3alpha,7alpha-diol              |
| 5-beta-Pregnan-3-one-20alpha-hydroxy             |
| 5-Bromo-7-nitroindoline                          |
| 5-Bromoindoline                                  |

|                                                       |
|-------------------------------------------------------|
| 5-Chloromethylfluorescein diethylether, 5-CMFDee      |
| 5-Cholesten-27-nor-3beta-ol-25-one                    |
| 5-DPT                                                 |
| 5-Hydroxyeicosatetraenoic acid, 5-HETE                |
| 5-Hydroxypsoralen                                     |
| 5-Methoxyindole                                       |
| 5-Methoxy-N,N-diisopropyltryptamine, 5-MeO-DIPT, Foxy |
| 5-Methoxy-N,N-dimethyltryptamin, 5-MDMT               |
| 5-Methoxytryptamine                                   |
| 5-Methylchrysene                                      |
| 5-Methylindole                                        |
| 5-O-Bzl-indole                                        |
| 6,6-d2-Testosterone                                   |
| 6',7'-Dihydroxybergamottin, DHB                       |
| 6alfa-d1-Testosterone                                 |
| 6alpha-Butoxyandrost-1,4-diene-3,17-dione 3c          |
| 6alpha-Butoxyandrost-4-ene-3,17-dione 1c              |
| 6alpha-Ethoxyandrost-1,4-diene-3,17-dione 3b          |
| 6alpha-Ethoxyandrost-4-ene-3,17-dione 1b              |
| 6alpha-Methoxyandrost-1,4-diene-3,17-dione 3a         |

|                                                  |
|--------------------------------------------------|
| 6alpha-Methoxyandrost-4-ene-3,17-dione 1a        |
| 6alpha-Methylandrost-4-ene-3,17-dione            |
| 6-Aminochrysene                                  |
| 6beta-Butoxyandrost-1,4-diene-3,17-dione 4c      |
| 6beta-Butoxyandrost-4-ene-3,17-dione 2c          |
| 6beta-d1-Testosterone                            |
| 6beta-Ethoxyandrost-1,4-diene-3,17-dione 4b      |
| 6beta-Ethoxyandrost-4-ene-3,17-dione 2b          |
| 6beta-Methoxyandrost-1,4-diene-3,17-dione 4a     |
| 6beta-Methoxyandrost-4-ene-3,17-dione 2a         |
| 6beta-Methylandrost-4-ene-3,17-dione             |
| 6-Chloromethylfluorescein diethylether, 6-CMFDee |
| 6-Methylchrysene                                 |
| 6-Nitrochrysene                                  |
| 6-Nitroindoline                                  |
| 6-Nitropyrene                                    |
| 6-Oxoandrostenedione                             |
| 7,10,13,16,19-(Z)-Docosapentaenoic acid          |
| 7,12-Dimethylbenz[a]anthracene, 7,12-DMBA        |
| 7,8-BF, 7,8-Benzoflavone, alpha-Naphthoflavone   |

|                                                        |
|--------------------------------------------------------|
| 7alpha-Hydroxy-4-cholesten-3-one                       |
| 7alpha-Methyl-19-nortestosterone, Trestolone           |
| 7-Benzyloxy-4-(trifluoromethyl)coumarin comp., BFBFC   |
| 7-Benzyloxy-4-(trifluoromethyl)-coumarin, BFC          |
| 7-Benzyloxy-4, N,N-diethylamino-methyl- coumarin, BDAC |
| 7-Benzyloxyquinoline, 7-BQ                             |
| 7-Benzyloxyresorufin, BzRes                            |
| 7-Butoxycoumarin                                       |
| 7-Butoxyresorufin                                      |
| 7-d2-Benzyloxyquinoline, 7-BQ                          |
| 7-Dehydrocholesterol                                   |
| 7-Dimethylamino-4-trifluoromethylcoumarin, C152        |
| 7-Ethoxy-4-trifluoromethylcoumarin, 7-EFC              |
| 7-Ethoxycoumarin                                       |
| 7-Ethoxyresorufin, 7-ER                                |
| 7H-Dibenzo[c,g]carbazole, DBC                          |
| 7-Heptoxycoumarin                                      |
| 7-Ketocholesterol                                      |
| 7-Methoxy-3-cyanocoumarin, CMC                         |
| 7-Methoxy-4-(aminomethyl)-coumarin, MAMC               |

|                                                        |
|--------------------------------------------------------|
| 7-Methoxy-4-(methylpyridinium)-coumarin, MMPyrC        |
| 7-Methoxy-4-methylcoumarin comp., AMMC                 |
| 7-Methoxy-4-trifluoromethylcoumarin comp., MeAMFC      |
| 7-Methoxy-4-trifluoromethylcoumarin, 7-MFC             |
| 7-Methoxy-4-trifluoromethylcoumarin-3-acetic acid, FCA |
| 7-Methoxycoumarin                                      |
| 7-Methoxyresorufin                                     |
| 7-Methylbenz(c)acridine, 7MBAC                         |
| 7-Pentoxyresorufin                                     |
| 7-Propoxyresorufin                                     |
| 8-Ethylfurafylline                                     |
| 8-Geranyloxypsoralen                                   |
| 8-Hydroxyeicosatetraenoate, 8-HETE                     |
| 8-Hydroxypsoralen                                      |
| 8iso-Prostaglandin H2, 8iso-PGH2                       |
| 8-Prenylnaringenin                                     |
| 9,10-Dihydrophenanthrene                               |
| 9,10-Dihydroxystearic acid, 9,10-DiSTA                 |
| 9,10-DiOME                                             |
| 9,11-Diazo-15-deoxy-PGH2, U-51605                      |

|                                       |
|---------------------------------------|
| 9,11-Epoxyethano-PGH2, U-44069        |
| 9-Anthralaldehyde                     |
| 9cUAB30                               |
| 9-Hydroxyeicosatetraenoate, 9-HETE    |
| 9-Methylanthracene                    |
| Abacavir                              |
| ABC 302367                            |
| Abecarnil                             |
| ABT-418                               |
| ABT-438                               |
| ABT-761                               |
| Aceclofenac                           |
| Acenocoumarol; (R)-; (S)-             |
| Acepromazine, Acetopromazine          |
| Acetaldehyde                          |
| Acetaminophen, Paracetamol            |
| Acetanilide                           |
| Acetochlor                            |
| Acetylmethadol, L-alpha-, LAAM        |
| Acetylmethadol, nor-L-alpha-, norLAAM |

|                                             |
|---------------------------------------------|
| Acetylsalicylic acid                        |
| Acrylonitrile, vinyl cyanide, cyanoethylene |
| Adamantan 950                               |
| Adinazolam                                  |
| Adrenaline, Epinephrine                     |
| Aflatoxin B1, AFB1                          |
| Aflatoxin B1-dialdehyde                     |
| Aflatoxin G1, AFG1                          |
| AG7088                                      |
| Alachlor                                    |
| Albendazole                                 |
| Albuterol, Salmeterol                       |
| Alfentanil                                  |
| Allopregnanolone                            |
| Allylisopropylacetamide, AIA                |
| Almotriptan                                 |
| Alosetron                                   |
| alpha-Dihydroergocryptine, DHEC             |
| alpha-Thujone                               |
| alpha-Tocopherol, Vitamin E                 |

|                                          |
|------------------------------------------|
| Alpidem                                  |
| Alprazolam                               |
| Alprenolol                               |
| Ambroxol                                 |
| Ametryne                                 |
| Amiflamine                               |
| Amino-3'-methylphenylnorharman           |
| Aminoflavone, NSC 68628                  |
| Aminophenylharman                        |
| Aminophenylnorharman                     |
| Aminopyrine, Amidopyrine, Aminophenazone |
| Amiodarone                               |
| Amitriptyline                            |
| Amlodipine                               |
| Amodiaquine                              |
| Amoxapine                                |
| Amphetamine                              |
| Amprenavir                               |
| Amsulalol                                |
| Anandamide                               |

|                                                            |
|------------------------------------------------------------|
| Androst-1,4,6-triene-3,17-dione                            |
| Androst-1,4,6-triene-3,17-diones, 6-alkyl-analogs          |
| Androst-1,4-diene-3,17-diones, 6-ether-analogs             |
| Androst-4,6-diene-3,17-dione                               |
| Androst-4,6-diene-3,17-diones, 6-alkyl-analogs             |
| Androst-4-ene-17-one                                       |
| Androst-4-ene-3,17-dione 16alpha-hydroxy                   |
| Androst-4-ene-3,17-dione, Androstenedione                  |
| Androst-4-ene-3,17-diones, 6alpha- and 6beta-alkyl-analogs |
| Androst-4-ene-3,17-diones, 6-ether-analogs                 |
| Androst-4-ene-6,17-dione                                   |
| Androst-5-ene-17-one                                       |
| Androst-5-ene-4,17-dione                                   |
| Androst-5-ene-7,17-dione                                   |
| Androstadiene-3,17-dione, 6-alkyl-analogs                  |
| Androstenedione 1beta-H3                                   |
| Androstenedione 2alpha-bromo                               |
| Androstenedione 2alpha-chloro                              |
| Androstenedione 2alpha-ethoxy                              |
| Androstenedione 2alpha-fluoro                              |

|                                      |
|--------------------------------------|
| Androstenedione 2alpha-methoxy       |
| Androstenedione 2alpha-methyl        |
| Androstenedione, delta1,6-           |
| Androstenedione, delta1,6-, 6-alkyl- |
| Androstenedione, delta6-             |
| Androstenedione, delta6-, 6-alkyl-   |
| Androsterone                         |
| Aniline                              |
| Anthracene                           |
| Anthracene-9-carboxaldehyde          |
| anti Hydroxy-spirosulfonamide        |
| Antipyrine, Phenazone                |
| Apigenin                             |
| Aplidine                             |
| Aprepitant                           |
| Aprindine                            |
| AQ4N                                 |
| Arachidonate, Arachidonic acid       |
| Arecoline                            |
| Aripiprazole                         |

|                                        |
|----------------------------------------|
| Aristolochic acid I                    |
| Aristolochic acid II                   |
| Arteether                              |
| Artelinic acid                         |
| Artemisinin                            |
| Artesunate, Artesunic acid             |
| Aryl-1,3-dithiolanes                   |
| Aryl-1,3-oxathiolanes                  |
| Arylamines                             |
| Astemizole                             |
| Atomoxetine, Tomoxetine, LY139603      |
| Atorvastatin lactone                   |
| Atorvastatin, Atorvastatin acid        |
| Atrasentan                             |
| Atrazine                               |
| AWD 131-138                            |
| Azabicyclofuranopyridine carboxamide 1 |
| Azabicyclopyridinecarboxamide 1        |
| Azelastine                             |
| Azelnidipine                           |

|                                       |
|---------------------------------------|
| Azimilide                             |
| Azinphos-methyl                       |
| Barnidipine                           |
| BAY 59-7939                           |
| Benidipine                            |
| Benidipine; (-)-alpha-; (+)-alpha-    |
| Benz[a]anthracene, 1,2-Benzanthracene |
| Benzbromarone                         |
| Benzbromarone 16                      |
| Benzbromarone 2a                      |
| Benzene                               |
| Benzene dihydrodiol                   |
| Benzhydrol                            |
| Benzo[a]perylene                      |
| Benzo[a]pyrene, B[a]P                 |
| Benzo[b]perylene                      |
| Benzo[c]phenanthrene, B[c]P           |
| Benzo[c]phenanthridine BP-7           |
| Benzodioxolylbutanamine (S,R)-, BDB   |
| Benzophenone                          |

|                                         |
|-----------------------------------------|
| Benzphetamine                           |
| Benztropine 4',4''-Cl                   |
| Benzydamine                             |
| Benzyl isothiocyanate                   |
| Benzylamine                             |
| Benzylamines para-substituted           |
| Bepridil                                |
| Bergamottin, 5-Geranoxypsoralen, GF-I-2 |
| Bergapten, 5-Methoxypsoralen            |
| beta-Tocopherol                         |
| Betaxolol                               |
| Bezafibrate                             |
| Bicalutamide (S)-, (R)-                 |
| Bicifadine                              |
| Bicifadine M12                          |
| Bisoprolol (S)- and (R)-                |
| Bisphenol A                             |
| BK8644, BayK8644                        |
| BMS-1                                   |
| BMS-2                                   |

|                           |
|---------------------------|
| BMS-214778                |
| BMS-3                     |
| BMS-310705                |
| BMS-378806                |
| BO-653                    |
| BO-653                    |
| Boldenone                 |
| Bortezomib M1             |
| Bortezomib M2             |
| Bortezomib, PS341         |
| Bosentan                  |
| Brinzolamide              |
| BRL0L075                  |
| Brofaromine               |
| Bromocriptine             |
| Bromodichloromethane      |
| Bromoperidol, Bromperidol |
| Bromuconazole 47          |
| Bropirimine               |
| Brotizolam                |

|                                        |
|----------------------------------------|
| Budesonide                             |
| Buflomedil                             |
| Bufuralol; (S)-; (R)-                  |
| Bunitrolol (+)-, (-)-                  |
| Bupivacaine                            |
| Bupranolol                             |
| Buprenorphine                          |
| Bupropion                              |
| Buspirone                              |
| Busulphan                              |
| Butachlor                              |
| Butadiene monoxide, 1,2-Epoxy-3-butene |
| BVT.2938                               |
| BYZX                                   |
| Ca. roseus                             |
| Caffeine                               |
| Canadine                               |
| Candesartan                            |
| Cannabinol                             |
| Capravirine                            |

|                          |
|--------------------------|
| Capravirine S-oxide      |
| Capsaicin                |
| Captopril                |
| Carbamazepine            |
| Carbamazepine C2-hydroxy |
| Carbamazepine C3-hydroxy |
| Carbaryl                 |
| Carbofuran               |
| Carbon tetrachloride     |
| Carebastine              |
| Carisoprodol             |
| Carteolol                |
| Carvedilol; (S)-; (R)-   |
| Celecoxib                |
| Celecoxib deriv. 1       |
| Celecoxib deriv. 10      |
| Celecoxib deriv. 11      |
| Celecoxib deriv. 12      |
| Celecoxib deriv. 13c     |
| Celecoxib deriv. 2       |

|                                                          |
|----------------------------------------------------------|
| Celecoxib deriv. 3                                       |
| Celecoxib deriv. 4                                       |
| Celecoxib deriv. 5                                       |
| Celecoxib deriv. 6                                       |
| Celecoxib deriv. 7                                       |
| Celecoxib deriv. 8                                       |
| Celecoxib deriv. 9                                       |
| Cephalomannine                                           |
| Cerivastatin lactone                                     |
| Cerivastatin O-demethyl                                  |
| Cerivastatin, Cerivastatin acid                          |
| Cetirizine (R,S)-; (S)-, ucb 28557; (R)-, Levocetirizine |
| Chenodeoxycholate, Chenodeoxycholic acid                 |
| Chlorodehydro-17alpha-methyltestosterone                 |
| Chloroform, Trichloromethane                             |
| Chloroquine                                              |
| Chlorpheniramine                                         |
| Chlorproguanil                                           |
| Chlorpromazine                                           |
| Chlorpropamide                                           |

|                                      |
|--------------------------------------|
| Chlorpyrifos                         |
| Chlorsulfuron                        |
| Chlortoluron                         |
| Chlorzoxazone                        |
| Cholate, Cholic acid                 |
| Cholestanol                          |
| Cholesterol 3-fatty acid esters      |
| Cholesterol 3-methylether            |
| Cholesterol 3-sulfate                |
| Cholesterol C7 $\alpha$ -hydroxy     |
| Chrysene                             |
| Cibenzoline; (S)-(-)-; (R)-(+)-      |
| Ciclesonide, des                     |
| Cilnidipine                          |
| Cilostazol                           |
| Cimetidine                           |
| Cinacalcet                           |
| Cinnarizine                          |
| Ciprofibrate                         |
| cis-(Z)-Clopenthixol, Zuclopenthixol |

|                                           |
|-------------------------------------------|
| Cisapride rac., (+)-; (-)-                |
| Cisplatin                                 |
| Citalopram, rac; (R)-; (S)-, Escitalopram |
| Citalopram aldehyde                       |
| CJ-036878                                 |
| CJ-036878 M10                             |
| Clarithromycin                            |
| Clindamycin                               |
| Clivorine                                 |
| Clobazam C4'-hydroxy                      |
| Clobazam N-desmethyl                      |
| Clofibrate                                |
| Clomethiazole, Chlormethiazole            |
| Clomipramine                              |
| Clonazepam                                |
| Clopidogrel                               |
| Clopidogrel 2-oxo                         |
| Clotiazepam                               |
| Clozapine                                 |
| CMV423                                    |

|                                  |
|----------------------------------|
| Cocaine, Cocaine (-), Cocaine l- |
| Codeine                          |
| Colchicine                       |
| Compound A                       |
| Compound A (NS5B)                |
| Compound A int. antag.           |
| Compound S4                      |
| Corticosterone                   |
| Cortisol, Hydrocortisone         |
| Cotinine, (S)-Cotinine           |
| Coumarin                         |
| CP-122,721                       |
| CP-125,611                       |
| CP-195,543                       |
| CP-199,331                       |
| CP-358,774                       |
| CP-677,623                       |
| CP-919,230                       |
| CQA 206-291                      |
| Curcumin                         |

|                                                       |
|-------------------------------------------------------|
| Cyamemazine                                           |
| Cyclic phosphate prodrug 7                            |
| Cyclo Leu-Phe                                         |
| Cyclo Lue-Pro                                         |
| Cyclo Phe-Pro                                         |
| Cyclobenzaprine                                       |
| Cyclocoumarol 9(S)-, 9(R)-                            |
| Cyclohexylline                                        |
| Cyclopenta[c,d]pyrene                                 |
| Cyclophosphamide                                      |
| Cyclosporin A, Cyclosporine, Cyclosporin, Ciclosporin |
| Cyclosporin G                                         |
| Cyproterone acetate                                   |
| D0870                                                 |
| Dacarbazine                                           |
| Daidzein                                              |
| Danazol                                               |
| Dantrolene                                            |
| Dapsone                                               |
| Darunavir                                             |

|                                                  |
|--------------------------------------------------|
| Daunomycin, Daunorubicin                         |
| DB844                                            |
| DDB                                              |
| Debrisoquine                                     |
| Decanoic acid, Capric acid                       |
| Decursinol angelate                              |
| Deguelin                                         |
| Dehydroaripiprazole, OPC-14857                   |
| Dehydroascorbic acid                             |
| Dehydroepiandrosterone 3-sulfate, DHEA 3-sulfate |
| Dehydroepiandrosterone, DHEA                     |
| Dehydropranidipine                               |
| Delavirdine                                      |
| delta3-Carene                                    |
| Deltamethrin                                     |
| delta-Tocotrienol                                |
| Denitronifedipine                                |
| Deoxycholate, Deoxycholic acid                   |
| Deoxypodophyllotoxin                             |
| Deramciclane                                     |

|                                        |
|----------------------------------------|
| Desglymidodrine                        |
| Desmethyadinazolam N-                  |
| Desmethylocitalopram, rac.; (R)-; (S)- |
| Desmethyloselegiline N-, (R)-(-)-      |
| Desmosterol                            |
| Desogestrel                            |
| Dexamethasone                          |
| Dexfenfluramine, D-(+)-fenfluramine    |
| Dexloxiglumide                         |
| Dextromethorphan                       |
| Dextropropoxyphene, Propoxyphene       |
| Dextrophan                             |
| DFB                                    |
| Diallyl disulfide, DADS                |
| Diallyl sulfide, DAS                   |
| Diallyl sulfone, DASO <sub>2</sub>     |
| Diazepam                               |
| Diazinon                               |
| Dibenz[a,h]acridine                    |
| Dibenz[a,h]anthracene                  |

|                              |
|------------------------------|
| Dibenz[a,j]acridine, DBAJAC  |
| Dibenzo[a,e]fluoranthene     |
| Dibenzo[a,e]pyrene, DB[a,e]P |
| Dibenzo[a,f]fluoranthene     |
| Dibenzo[a,h]pyrene, DB[a,h]P |
| Dibenzo[a,i]pyrene           |
| Dibenzo[a,k]fluoranthene     |
| Dibenzo[a,l]pyrene, DB[a,l]P |
| Dibenzo[b,k]fluoranthene     |
| Dibenzo[e,l]pyrene, DB[e,l]P |
| Dibenzo[j,l]fluoranthene     |
| Dibenzo-p-dioxin, DD         |
| Dibenzylfluorescein, DBF     |
| Diclofenac                   |
| Diclofenac acyl glucuronide  |
| Diclofenac C5-hydroxy        |
| Dicoumarol, Dicoumarin       |
| Didesmethylcitalopram        |
| Diethylcarbamazine           |
| Diflomotecan, BN80915        |

|                                        |
|----------------------------------------|
| Digitoxin                              |
| Dihydralazine                          |
| Dihydrobenzoxanthiin I                 |
| Dihydrobenzoxanthiin II                |
| Dihydrobromoperidol (S,R)-; (S)-; (R)- |
| Dihydrocapsaicin                       |
| Dihydrocodeine                         |
| Dihydroequilenin, 17beta-              |
| Dihydroergotamine                      |
| Dihydrohaloperidol (S,R)-; (S)-; (R)-  |
| Dihydrolanosterol                      |
| Dihydropyridine comp. 10               |
| Dihydropyridine comp. 11               |
| Dihydropyridine comp. 13               |
| Dihydropyridine comp. 14               |
| Dihydropyridine comp. 15               |
| Dihydropyridine comp. 16               |
| Dihydropyridine comp. 17               |
| Dihydropyridine comp. 18               |
| Dihydropyridine comp. 19 (+)           |

|                                  |
|----------------------------------|
| Dihydropyridine comp. 20 (-)     |
| Dihydropyridine comp. 21         |
| Dihydropyridine comp. 3          |
| Dihydropyridine comp. 8          |
| Dihydropyridine comp. 9          |
| Dihydrotachysterol3              |
| Diltiazem                        |
| Dimethoate                       |
| Dimethyl benzoylphenylurea       |
| Diphenhydramine                  |
| Diprafenone                      |
| Disopyramide, (S)-(+)-, (R)-(-)- |
| Disulfoton                       |
| Diuron                           |
| DL-Glyceraldehyde                |
| DMP 543                          |
| DMP 543 despicolyl               |
| Docetaxel, Taxotere              |
| Dolasetron                       |
| Dolasetron reduced               |

|                                |
|--------------------------------|
| Domperidone                    |
| Donepezil                      |
| Dopamine                       |
| Dopamine                       |
| Dorzolamide                    |
| Doxepin E (trans-); Z (cis-)   |
| Doxepin E (trans-) N-desmethyl |
| DPC 681                        |
| DPC 684                        |
| DPM777                         |
| DRF 4367                       |
| Duloxetine                     |
| DY-9760e                       |
| E2101                          |
| E7389                          |
| Ebastine                       |
| Ebastine hydroxy               |
| Ecabapide                      |
| Efavirenz                      |
| Efavirenz C8-hydroxy           |

|                              |
|------------------------------|
| Eicosapentaenoic acid        |
| Eicosatrienoic acid          |
| Eletriptan                   |
| Ellipticine                  |
| Emetine                      |
| EMTPP                        |
| Emulgens, 911 and 913        |
| Enalapril                    |
| Encainide                    |
| Endosulfan, Endosulfan alpha |
| Enflurane (R,S)-, (S)-, (R)- |
| Epiandrosterone, EPIA        |
| Epinastine                   |
| Epitestosterone              |
| Eplerenone                   |
| epsilon-Tocopherol           |
| Equilenin                    |
| Ergosterol                   |
| Eriodictyol                  |
| Erlotinib                    |

|                                                     |
|-----------------------------------------------------|
| Erythromycin                                        |
| Esfenvalerate                                       |
| Estazolam                                           |
| Estradiol 17beta-                                   |
| Estradiol 17beta-D-glucuronide, E(2)17betaG         |
| Estradiol 3-methyl ether                            |
| Estradiol C2-hydroxy                                |
| Estradiol C2-hydroxy, C3-methoxy                    |
| Estradiol C2-methoxy                                |
| Estradiol C4-hydroxy                                |
| Estragole                                           |
| Estrone                                             |
| Estrone 3-sulfate                                   |
| Eszopiclone                                         |
| ET-743, Ecteinascidin 743, Trabectedin              |
| Ethanol                                             |
| Ethinylestradiol 17alpha, Ethynylestradiol 17alpha- |
| Ethiprole                                           |
| Ethofumesate                                        |
| Ethosuximide                                        |

|                              |
|------------------------------|
| Ethoxidine                   |
| Ethyl carbamate, Urethan     |
| Ethyl tert-butyl ether       |
| Ethylbenzene                 |
| Ethylenethiourea             |
| Ethylmorphine                |
| Ethyl-p-tolyl sulfide        |
| Etizolam                     |
| Etodolac                     |
| Etoferidone                  |
| Etoferidone p-hydroxy        |
| Etoposide, VP-16             |
| Etoricoxib                   |
| Eugenol                      |
| Eupatilin                    |
| Everolimus, SDZ-RAD          |
| Ezlopitant                   |
| Ezlopitant alkene, CJ-12,458 |
| Fadrozole, CGS 16949A        |
| Farnesol                     |

|                                                |
|------------------------------------------------|
| Fatty acid C22                                 |
| Fatty acid C24, Lignoceric acid                |
| Fatty acid C26, Cerotic acid                   |
| Fatty acids, long-chain                        |
| Fatty acids, polyunsaturated                   |
| Felbamate                                      |
| Felodipine                                     |
| Fenofibrate                                    |
| Fenproporex                                    |
| Fenretinide, 4-Hydroxyphenyl retinamide, 4-HPR |
| Fentanyl                                       |
| Fenthion                                       |
| Ferroquine, SSR97193                           |
| Finasteride                                    |
| Fipronil                                       |
| FK228, FR901228, Depsipeptide                  |
| Flecainide                                     |
| Flosequinan                                    |
| Flu-1                                          |
| Flucloxacillin                                 |

|                                |
|--------------------------------|
| Flunarizine                    |
| Flunitrazepam                  |
| Fluoranthene-2,3-diol          |
| Fluorescein diethylether, FDee |
| Fluoxetine rac., (R)-, (S)-    |
| Flupentixol, Flupenthixol      |
| Fluperlapine                   |
| Fluphenazine                   |
| Flurbiprofen; (S)-; (R)-       |
| Flutamide                      |
| Fluticasone propionate         |
| Fluvastatin lactone            |
| Fluvastatin, Fluvastatin acid  |
| Fluvoxamine                    |
| Formononetin                   |
| Formoterol                     |
| Furafylline                    |
| Furametpyr                     |
| Furan                          |
| Galanthamine                   |

|                                        |
|----------------------------------------|
| Gallopamil (S)- and (R)-               |
| gamma-Tocopherol                       |
| Ganaxolone                             |
| Gefitinib, ZD1839                      |
| Gemfibrozil                            |
| Gemfibrozil 1-O-beta glucuronide       |
| Genistein                              |
| Genistein 4'-methyl ether, Biochanin A |
| Gepirone                               |
| Gliclazide                             |
| Glimepiride                            |
| Glipizide                              |
| Glyburide, Glibenclamide               |
| Glyceryl trinitrate, NTG               |
| GR87442                                |
| Granisetron                            |
| GTS-21, DMXB                           |
| Guanabenz                              |
| Guanoxan                               |
| GW420867X                              |

|                                         |
|-----------------------------------------|
| GW844520                                |
| H 259-31 (S)- and (R)-                  |
| Halofantrine                            |
| Haloperidol                             |
| Haloperidol pyridinium metabolite, HPP+ |
| Haloperidol pyridinium metabolite, HPTP |
| Halothane                               |
| Harmine                                 |
| Heptylphenyltetrahydropyridine 15       |
| Hesperetin, Hesperitin                  |
| Hexachlorobenzene, Perchlorobenzene     |
| Hexamethylphosphoramide                 |
| Hexane, n-                              |
| Hexobarbital; (S)-(+)-; (R)-(-)-        |
| HM-30181                                |
| Homocapsaicin                           |
| Homodihydrocapsaicin                    |
| HP184                                   |
| Hydrochloroflourocarbons                |
| Hydrocodone                             |

|                                     |
|-------------------------------------|
| Hydromorphone                       |
| Hydroxyitraconazole                 |
| Hydroxymethyl-methylformamide, HMMF |
| Ibogaine                            |
| Ibrolipim, NO-1886                  |
| Ibuprofen; (S)-; (R)-               |
| Ifosfamide rac.; (R)-; (S)-         |
| Iloperidone                         |
| Imatinib, STI571                    |
| Imazosulfuron                       |
| Imidacloprid                        |
| Imidafenacin                        |
| Imipramine                          |
| Imiquimod                           |
| Imrecoxib                           |
| Indan-1-ol; -(S)-ol; -(R)-ol        |
| Indinavir                           |
| Indinavir N-depyridomethyl          |
| Indiplon N-desacetyl                |
| Indiplon, NBI-34060                 |

|                                               |
|-----------------------------------------------|
| Indirubin                                     |
| Indisulam, E7070                              |
| Indole                                        |
| Indoline                                      |
| Indomethacin                                  |
| Indomethacin phenethylamide, LM-4108          |
| Indoramin                                     |
| Ipriflavone                                   |
| Ipriflavone M4                                |
| Irbesartan                                    |
| Irinotecan, CPT-11                            |
| Isobutylamide 10                              |
| Isoflurane                                    |
| Isoleukotoxin, Z12(13)-EpOME                  |
| Isoliquiritigenin, 2',4,4'-Trihydroxychalcone |
| Isoniazid                                     |
| Isoprene                                      |
| Isoquinoline                                  |
| Isosorbide dinitrate, ISDN                    |
| Isoxanthohumol                                |

|                            |
|----------------------------|
| Isradipine                 |
| Itopride                   |
| Itraconazole; (2R,4S,2'S)- |
| Ivermectin                 |
| JNJ-10287069               |
| JPC-2056                   |
| K11777, K77                |
| Kaempferide                |
| Kaempferol                 |
| Karenitecin                |
| Kavain, Kawain             |
| Ketamine; (R)-; (S)-       |
| Ketobemidone               |
| Ketoconazole N-deacetyl    |
| Ketoitraconazole           |
| Ketone 3                   |
| KR-2                       |
| KR-31543                   |
| KR-31831                   |
| KR-32570                   |

|                                  |
|----------------------------------|
| KR-33028, KR-1                   |
| KR-60436                         |
| Kynuramine, Diaminopropiophenone |
| L-754,394                        |
| L-775,606                        |
| Lanosterol                       |
| Lansoprazole rac., (R)-, (S)-    |
| Lapachenole                      |
| Laquinimod                       |
| Lasoflofen                       |
| Lauric acid                      |
| Leflunomide                      |
| Lercanidipine                    |
| Leukotoxin, Z9(10)-EpOME         |
| Leukotriene B4; 6-trans-LTB4     |
| Levobupivacaine                  |
| Levonorgestrel                   |
| Lidocaine, Lignocaine            |
| Lilopristone                     |
| Limonene (+)- and (-)-           |

|                                |
|--------------------------------|
| Linalol                        |
| Linolate, Linoleic acid        |
| Linolenic acid                 |
| Lipids                         |
| Lipoxin A4, LXA4               |
| Lisofylline                    |
| Lisuride                       |
| Lithocholate, Lithocholic acid |
| L-methionine, Met              |
| Lonafarnib, SCH66336           |
| Loperamide                     |
| Loperamide N-desmethyl         |
| Lopinavir, ABT-378             |
| Loratadine                     |
| Lornoxicam                     |
| Losartan                       |
| Losigamone, (+-, +, -)-        |
| Lovastatin, Lovastatin lactone |
| LTA                            |
| Lu 25-109                      |

|                                |
|--------------------------------|
| Luciferin-BE                   |
| Luciferin-CEE                  |
| Luciferin-H                    |
| Luciferin-H EGE                |
| Luciferin-ME                   |
| Luciferin-ME-EGE               |
| Luciferin-PFBE                 |
| Luciferin-PPXEE                |
| Lumiracoxib                    |
| LY333531                       |
| M100907                        |
| M17055                         |
| M445526                        |
| Malathion                      |
| Maprotiline                    |
| MC12181                        |
| m-Chlorophenylpiperazine, mCPP |
| MDL 73005                      |
| MDPPP                          |
| Medifoxamine                   |

|                                                              |
|--------------------------------------------------------------|
| Medroxyprogesterone                                          |
| Mefenamic acid                                               |
| Mefloquine                                                   |
| Melatonin                                                    |
| Meloxicam                                                    |
| Menthofuran (R)-(+)-                                         |
| Meperidine, Pethidine                                        |
| Mephénytoin; (S)-                                            |
| Mephobarbital (R)-; (S)-                                     |
| Mepyramine, Mepiramine, Pyrilamine                           |
| Mequitazine                                                  |
| Merck KgaA EMD 68853                                         |
| Mestranol                                                    |
| Metamitron                                                   |
| Methacetin                                                   |
| Methadone rac., (S)-(+)- and (R)-(-)-                        |
| Methamphetamine D-, Methylamphetamine (+)-, (S)-; (-)-, (R)- |
| Methandrostenolone, Metandienone                             |
| Methaqualone                                                 |
| Methimazole                                                  |

|                                             |
|---------------------------------------------|
| Methiocarb                                  |
| Methoxalen, 8-Methoxypsoralen, Xanthotoxin  |
| Methoxychlor                                |
| Methoxychlor catechol                       |
| Methoxychlor O-bisdesmethyl (bis-hydroxy)   |
| Methoxychlor O-monodesmethyl (mono-hydroxy) |
| Methoxyflurane                              |
| Methyl tert-amyl ether                      |
| Methyl tert-butyl ether                     |
| Methylaniline, N-                           |
| Methylanisole                               |
| Methylchloride                              |
| Methylene chloride                          |
| Methyleugenol                               |
| Methyl-n-pentylnitrosamine                  |
| Methylprednisolone                          |
| Methyl-p-tolyl sulfide                      |
| Metoclopramide                              |
| Metolachlor                                 |
| Metoprolol rac., (S)-, (R)-                 |

|                                  |
|----------------------------------|
| Metronidazole                    |
| Mexazolam                        |
| Mexiletine                       |
| Mianserin (R)-, (S)-             |
| Mibefradil                       |
| Midazolam                        |
| Mifepristone, RU38486, RU486     |
| Milacemide                       |
| Milameline                       |
| Minaprine                        |
| Miocamycin                       |
| Mirtazapine                      |
| Mixture of aniline and norharman |
| MK-0457                          |
| MK-0524                          |
| MK-0767                          |
| MK-0767 M16                      |
| MK-0767 methyl mercapto M25      |
| MKC-963                          |
| ML3603                           |

|                                            |
|--------------------------------------------|
| MMDL                                       |
| Moclobemide                                |
| Modafinil                                  |
| Monocrotaline                              |
| Montelukast                                |
| Morphine                                   |
| Morpholine-urea-Phe-Hphe-vinylsulfone, K02 |
| Morpholinodoxorubicin, MDX                 |
| Mosapride                                  |
| MPPE                                       |
| MPTP 3,4-cyclopropyl                       |
| MPTP 3-pyrrolinyl                          |
| MRK-1                                      |
| MTMCD                                      |
| Muraglitazar                               |
| Myclobutanil                               |
| Mycophenolic acid                          |
| Myristicin                                 |
| Myristicin                                 |
| N-(4-ethoxyphenyl)isobutyramide            |

|                                                          |
|----------------------------------------------------------|
| N-(4-ethoxyphenyl)propionamide                           |
| N-(4-methoxyphenyl)propionamide                          |
| N,N- Dialkylnitrosamines (short chain)                   |
| N,N',N''-Triethylene thiophosphoramidate, thioTEPA       |
| N,N-dialkylnitrosamines (bulky chains)                   |
| N,N-dialkylnitrosamines (long chain)                     |
| N,N-diallylamphetamine                                   |
| N,N-diethyldithiocarbamate, DDC                          |
| N,N-diethylformamide, DEF                                |
| N,N-diethyl-m-toluamide, DEET                            |
| N,N-dimethyl 7-methoxy-4-(aminomethyl)-coumarin, diMMAMC |
| N,N-dimethylaniline                                      |
| N,N-dimethylformamide, DMF                               |
| N-[4-(1-methylethoxy)phenyl]acetamide                    |
| N'-4-Imidazoleethylthiourea 1                            |
| N'-4-Imidazoleethylthiourea 10                           |
| N'-4-Imidazoleethylthiourea 11                           |
| N'-4-Imidazoleethylthiourea 12                           |
| N'-4-Imidazoleethylthiourea 2                            |
| N'-4-Imidazoleethylthiourea 3                            |

|                                    |
|------------------------------------|
| N'-4-Imidazoleethylthiourea 4      |
| N'-4-Imidazoleethylthiourea 5      |
| N'-4-Imidazoleethylthiourea 6      |
| N'-4-Imidazoleethylthiourea 7      |
| N'-4-Imidazoleethylthiourea 8      |
| N'-4-Imidazoleethylthiourea 9      |
| Nabumetone hydroximine             |
| N-Ac-DFEC                          |
| N-Ac-PCBC                          |
| N-alkyltetrahydroquinoline comp. A |
| N-alkyltetrahydroquinoline comp. B |
| Naloxone                           |
| Naltrexone                         |
| Naphthalene                        |
| Naphthalene 1,2-diol               |
| Naphtho[1,2-b]fluoranthene         |
| Naphtho[1,2-k]fluoranthene         |
| Naphtho[2,1-a]pyrene               |
| Naphtho[2,3-a]pyrene               |
| Naphtho[2,3-b]fluoranthene         |

|                                                   |
|---------------------------------------------------|
| Naphtho[2,3-e]pyrene                              |
| Naproxen (S,R)-, (S)-, (R)-                       |
| Naringenin                                        |
| Nateglinide, AY4166                               |
| Naveglitazar                                      |
| NBI-42902                                         |
| N-butyl 7-methoxy-4-(aminomethyl)-coumarin, BMAMC |
| N-butylamphetamine                                |
| n-Butyl-p-tolyl sulfide                           |
| NCX-4016                                          |
| N-desmethyldiphenhydramine                        |
| NE-100                                            |
| Nebivolol d,l                                     |
| Nefazodone p-hydroxy                              |
| Nefiracetam                                       |
| Nelfinavir                                        |
| Nemorubicin, MMDX                                 |
| Netamiftide, INN 00835                            |
| N-ethyl 7-methoxy-4-(aminomethyl)-coumarin, EMAMC |
| N-ethylamphetamine, Ethamphetamine                |

|                                                    |
|----------------------------------------------------|
| N-ethylformamide, NEF                              |
| N-ethyl-N-methylaniline                            |
| Nevirapine                                         |
| N-heptyl tetrahydropyridine                        |
| N-hydroxyarginine                                  |
| Nicardipine                                        |
| Nicotine, (S)-(-)-Nicotine                         |
| Nifedipine                                         |
| Nile Red                                           |
| Niludipine                                         |
| Nilvadipine                                        |
| Nimodipine                                         |
| Nirvanol, (S)-(+)-N-3-benzyl                       |
| Nisoldipine                                        |
| Nitrendipine                                       |
| Nitrophenol o-, 2-Nitrophenol                      |
| Nitrophenol p-, 4-Nitrophenol                      |
| N-methyl 7-methoxy-4-(aminomethyl)-coumarin, MMAMC |
| N-methyl-benzodioxazolylbutanamine (S,R)-, MBDB    |
| N-methyldibenzo[c,g]carbazole, MeDBC               |

|                                                         |
|---------------------------------------------------------|
| N-methylformamide, NMF                                  |
| N-methyl-N-allylamphetamine                             |
| N-methyl-N-propargyl-2-phenylethylamine                 |
| N-methyl-N-propargylamphetamine                         |
| N-methyl-N-propylamphetamine                            |
| N-Methyryptoline                                        |
| NNAL rac., (R)-, (S)-                                   |
| N-nitrosoanabasine, NABS                                |
| N-nitrosoanatabine, NATB                                |
| N-nitrosobenzylmethylamine                              |
| N-nitroso-beta-hydroxypropylpropylamine, NHPPA          |
| N-nitroso-beta-oxopropylpropylamine, NOPPA              |
| N-nitrosodiamylamine, NDAA                              |
| N-nitrosodibutylamine, N,N-dibutylnitrosamine, NDBA     |
| N-nitrosodiethylamine, N,N-diethylnitrosamine, NDEA     |
| N-nitrosodimethylamine, N,N-dimethylnitrosamine, NDMA   |
| N-nitrosodi-n-propylamine, N-nitrosodipropylamine, NDPA |
| N-nitrosoethylbutylamine, NEBA                          |
| N-nitrosomethylbutylamine, NMBA                         |
| N-nitrosomethylethylamine, NMEA                         |

|                                                                |
|----------------------------------------------------------------|
| N-nitrosomethyl-n-amylamine                                    |
| N-nitrosomethylphenylamine, NMPhA                              |
| N-nitrosomethylpropylamine, NMPA                               |
| N-nitrosomorpholine, NMOR                                      |
| N'-nitrosornicotine, N-nitrosornicotine, NNN; , NNN (R)-; (S)- |
| N-nitrosopiperidine, NPIP                                      |
| N-nitrosopyrrolidine, NPYR                                     |
| n-Octylamine                                                   |
| Nomifensine                                                    |
| Nonane                                                         |
| Nonanoic acid                                                  |
| Nonivamide                                                     |
| Nonylphenyltetrahydropyridine 17                               |
| Noradrenaline, Norepinephrine                                  |
| Norbuprenorphine                                               |
| Norcocaine                                                     |
| Norcodeine                                                     |
| Nordiazepam, N-desmethyldiazepam                               |
| Nordihydroapsaicin                                             |
| Norverapamil rac., (R)-, (S)-                                  |

|                                                    |
|----------------------------------------------------|
| Norfluoxetine (S)-                                 |
| Norflurazon                                        |
| Noroxycodone                                       |
| Nortestosterone                                    |
| Nortriptyline                                      |
| N-propyl 7-methoxy-4-(aminomethyl)-coumarin, PMAMC |
| N-propylajmaline                                   |
| n-Propyl-p-tolyl sulfide                           |
| NS-21                                              |
| n-Vinilyldecanamide                                |
| O6-Benzyl-8-oxoguanine                             |
| O6-Benzylguanine                                   |
| o-Aminoazotoluene                                  |
| o-Anisidine, 2-Methoxyaniline                      |
| Ochratoxin A                                       |
| Octanoate, Octanoic acid                           |
| Octopamine, p-Norsynephrine, Noroxedrine           |
| Octylphenyltetrahydropyridine 16                   |
| Olanzapine                                         |
| Oleate, Oleic acid                                 |

|                              |
|------------------------------|
| Olopatadine                  |
| Omeprazole (S)-, (R)-, rac.  |
| Omeprazole sulfide           |
| Onapristone, ZK 98.299       |
| Ondansetron                  |
| Opipramol                    |
| Oracin                       |
| Org 30659                    |
| Org 4060                     |
| Orphenadrine                 |
| Oxatomide                    |
| Oxazolidinedione comp. A     |
| Oxedrine, Synephrine, p-     |
| Oxodipine                    |
| Oxybutynin rac., (S)-, (R)-  |
| Oxycodone                    |
| Oxymetazoline                |
| Oxymorphone                  |
| Paclitaxel                   |
| Paclitaxel 3'-phenyl-hydroxy |

|                                    |
|------------------------------------|
| Paclitaxel 6alpha-hydroxy          |
| Pafuramide, DB289                  |
| Pafuramide, DB289-M1               |
| Pafuramide, DB289-M3               |
| Pafuramide, DB289-M4               |
| Palmitate, Palmitic acid           |
| Palmitoleic acid                   |
| Pantoprazole                       |
| para-Biphenylhydrazine             |
| Parathion                          |
| Paraxanthine, 1,7-Dimethylxanthine |
| Pargyline                          |
| Paroxetine                         |
| p-Benzoylphenol                    |
| p-Benzoylphenol                    |
| p-CF3-Benzylamine                  |
| p-Chloro-m-xyleneol, PCMX          |
| Pefloxacin                         |
| Pentamidine                        |
| Pentylamino comp. 1                |

|                                   |
|-----------------------------------|
| Pentylphenyltetrahydropyridine 14 |
| Perazine                          |
| Perchloroethylene                 |
| Perhexiline, rac., (-)-, (+)-     |
| Perospirone                       |
| Perphenazine                      |
| Phenacetin                        |
| Phenanthrene                      |
| Phenanthrene C9,10-quinone        |
| Phencyclidine                     |
| Phenelzine                        |
| Phenethyl isothiocyanate          |
| Phenformin, Phenphormine          |
| Phenobarbital                     |
| Phenobarbital, (R)-(-)-N-3-benzyl |
| Phenol                            |
| Phenolic fluorescent dyes         |
| Phenothiazine                     |
| Phenprocoumon (S)-, (R)-          |
| Phenprocoumon 4-MeO, (S)-, (R)-   |

|                                    |
|------------------------------------|
| Phenyl ketone 1                    |
| Phenylacrylamide 1                 |
| Phenylbutazone                     |
| Phenyldiazene                      |
| Phenyldiaziridine 9                |
| Phenylethyl comp. 5                |
| Phenylethylamines para-substituted |
| Phenylethylamino comp. 2           |
| Phenylethylamino comp. 4           |
| Phenylphenol o-                    |
| Phenylthiourea                     |
| Phenytoin, C3'-hydroxy             |
| Phenytoin, C4'-hydroxy             |
| Phenytoin, Diphenylhydantoin       |
| Phorate                            |
| Phosphatidylcholine, PC            |
| Phthalimide analogues              |
| Phytanic acid                      |
| Piceid                             |
| Pigment Yellow 74, PY74            |

|                                         |
|-----------------------------------------|
| Pilocarpine                             |
| Pimobendan                              |
| Pimozide                                |
| Pinacidil                               |
| Pinoline                                |
| Pioglitazone                            |
| Pirenzepine                             |
| Piroxicam                               |
| Pitavastatin lactone                    |
| Pitavastatin, Pitavastatin acid, NK-104 |
| p-Nitrobenzylamine                      |
| p-Nitrophenylethylamine                 |
| PNU-171990                              |
| PPI-2458                                |
| Pradefovir                              |
| Pranidipine                             |
| Pranidipine metabolite, MOP-13031       |
| Prasugrel 2-oxo, R-95913                |
| Pravastatin, Pravastatin acid           |
| Praziquantel                            |

|                                                                  |
|------------------------------------------------------------------|
| Prednisone                                                       |
| Pregnenolone                                                     |
| Pregnenolone C17alpha-hydroxy                                    |
| Pregnenolone C21-hydroxy                                         |
| Primaquine                                                       |
| Procainamide                                                     |
| Progesterone                                                     |
| Progesterone C20alpha-hydroxy                                    |
| Proguanil, Chloroguanide                                         |
| PROLI-NO                                                         |
| Promethazine                                                     |
| Prometryne                                                       |
| Propafenone (R,S)-, (S)-, (R)-                                   |
| Propionylpromazine                                               |
| Propofol                                                         |
| Propranolol; (2R)-(+)-; (2S)-(-)-                                |
| Propranolol (2S)- difluoro                                       |
| Propranolol (2S)- monofluoro                                     |
| Propranolol (2S,4R)- trifluoro; (2S)- trifluoro; (2R)- trifluoro |
| Propranolol deshydroxy                                           |

|                                             |
|---------------------------------------------|
| Propranolol i-propylmethyl                  |
| Propranolol t-butylmethyl                   |
| Propranolol trifluoro deshydroxy            |
| Propranolol trifluoroethyl                  |
| Propylajamaline, N-                         |
| Propylphenyltetrahydropyridine 12           |
| Prostaglandin D2, PGD2                      |
| Prostaglandin E2, PGE2, Dinoprostone        |
| Prostaglandin F2alpha, PGF2alpha            |
| Prostaglandin G2, PGG2                      |
| Prostaglandin H1, PGH1                      |
| Prostaglandin H2, PGH2                      |
| Prostaglandin H3, PGH3                      |
| Prunetin                                    |
| PS-15                                       |
| PSG26, 3,4,5-Trimethoxyphenyldiaziridine 1f |
| Psoralen                                    |
| Pulegone (R)-(+)-                           |
| PY74-M1                                     |
| Pyrantel                                    |

|                              |
|------------------------------|
| Pyrazoloacridine             |
| Pyrene                       |
| Pyributicarb                 |
| Pyridine metab. 21           |
| Pyrimethamine                |
| Pyriminobac-methyl           |
| Quazepam                     |
| Quazepam 2-oxo               |
| Quetiapine, Seroquel         |
| Quinacrine, Mepacrine        |
| Quinidine                    |
| Quinine                      |
| Quinoline                    |
| Quinoline 6-methoxy          |
| Quinoline 6-methoxydeuterio  |
| Quizalofop-ethyl             |
| R-568                        |
| R-95913                      |
| Rabeprazole thioether        |
| Rabeprazole, LY307640, E3810 |

|                                                  |
|--------------------------------------------------|
| Raloxifene                                       |
| Ranitidine                                       |
| Ranolazine                                       |
| Rasagiline, (S)-, S-PAI                          |
| Rebamipide                                       |
| Reboxetine (S,S)- and (R,R)-                     |
| Rec 27.0110                                      |
| Reduced haloperidol pyridinium metabolite, RHPP+ |
| Remoxipride                                      |
| Repaglinide                                      |
| Repertaxin                                       |
| Resiquimod                                       |
| Resveratrolside                                  |
| Retinal 9-cis-, Isoretinene A                    |
| Retinal all trans-, Retinene                     |
| Retinoic acid 13-cis-, Isotretinoin              |
| Retinoic acid 9-cis-, Panretin                   |
| Retinoic acid all trans-, ATRA, Tretinoin        |
| Retinol all trans-, Vitamin A1                   |
| Retrorsine                                       |

|                                           |
|-------------------------------------------|
| Riddelliine                               |
| Rifabutin                                 |
| Rifabutin, 25-O-desacetyl, LM565          |
| Rifalazil, Benzoxazinorifamycin, KRM-1648 |
| Riluzole                                  |
| Risperidone                               |
| Ritonavir                                 |
| Rizatriptan                               |
| RL3142                                    |
| RO115-1954                                |
| RO3300074                                 |
| Rofecoxib                                 |
| Ropinirole                                |
| Ropivacaine                               |
| Roquinimex                                |
| Rosiglitazone                             |
| Rosuvastatin lactone                      |
| Rosuvastatin, Rosuvastatin acid, ZD 4522  |
| Rotenone                                  |
| Roxatidine metabolite M4                  |

|                                                           |
|-----------------------------------------------------------|
| Roxatidine metabolite M5                                  |
| Roxithromycin                                             |
| Roxithromycin decladinosyl                                |
| Roxithromycin N-desmethyl                                 |
| Roxithromycin O-dealkyl                                   |
| RP 73401, Piclamilast, DCMB, PNU 249173                   |
| RPR 106541                                                |
| RPR 127025                                                |
| RPR 130863; (+)-; (-)-                                    |
| Rupatadine                                                |
| Rutecarpine, Rutaecarpine                                 |
| RWJ-51204                                                 |
| RWJ-53050                                                 |
| RWJ-69528                                                 |
| S 16020                                                   |
| S-2-[4-(3-Methyl-2-thienyl)phenyl]propionic acid, S-MTPPA |
| Safrole                                                   |
| Salicylate, Salicylic acid                                |
| S-allyl-L-cysteine                                        |
| Saquinavir                                                |

|                                      |
|--------------------------------------|
| SCH 351125                           |
| SDZ IMM 125                          |
| SDZ NKT 343                          |
| Se-benzyl-L-selenocysteine           |
| Seleno-l-methionine                  |
| Senecionine                          |
| Seratrodist                          |
| Serotonin, 5-Hydroxytryptamine, 5-HT |
| Sertindole                           |
| Sertraline                           |
| Sevoflurane                          |
| Sildenafil                           |
| Silodosin                            |
| Silybin, Silibinin                   |
| Simazine                             |
| Simvastatin acid                     |
| Simvastatin, Simvastatin lactone     |
| Sinomenine                           |
| Sirolimus, Rapamycin                 |
| Sitagliptin                          |

|                                            |
|--------------------------------------------|
| SM-12502                                   |
| S-methyl-esonarimod                        |
| S-methyl-N,N-diethyldithiocarbamate, MeDDC |
| SNI-2011                                   |
| Solifenacin                                |
| Sorafenib                                  |
| Sparteine                                  |
| Spirosulfonamide                           |
| SQ109                                      |
| SR-144190                                  |
| Stearic acid                               |
| Sterigmatocystin                           |
| Sterinodole                                |
| Stilbestrol, Diethylstilbestrol            |
| Styrene, Vinyl benzene                     |
| SU5416                                     |
| Sufentanil                                 |
| Sulfadiazine                               |
| Sulfamethoxazole                           |
| Sulfamethoxazole N-hydroxy                 |

|                                            |
|--------------------------------------------|
| Sulfamidine, Sulfadimidine, Sulfamethazine |
| Sulfaphenazole deriv. 23, DMZ              |
| Sulfinpyrazone                             |
| Sulfinpyrazone sulfide                     |
| Sulindac sulfide                           |
| Sulprofos                                  |
| Sumatriptan                                |
| Sunitinib                                  |
| Suprofen                                   |
| syn Hydroxy-spirosulfonamide               |
| TA compound 1                              |
| Tacrine                                    |
| Tacrolimus, FK506                          |
| Tadalafil                                  |
| Tamarixetin                                |
| Tamoxifen                                  |
| Tamoxifen 3-hydroxy, Droloxifene           |
| Tamoxifen 4-hydroxy; trans-4-hydroxy (Z)   |
| Tamoxifen N-desmethyl                      |
| Tamoxifen N-oxide                          |

|                                                    |
|----------------------------------------------------|
| Tamsulosin                                         |
| Tandospirone                                       |
| Tangeretin                                         |
| Tanshinone I                                       |
| Targretin                                          |
| Tasosartan                                         |
| Taurochenodeoxycholate, Taurochenodeoxycholic acid |
| Tauromustine                                       |
| Tazarotenic acid                                   |
| Tazofelone                                         |
| Tegafur                                            |
| Tegaserod                                          |
| Telithromycin                                      |
| Temazepam                                          |
| Temsirolimus                                       |
| Teniposide                                         |
| Tenoxicam                                          |
| Tentoxin                                           |
| Terbinafine                                        |
| Terbuthylazine                                     |

|                                 |
|---------------------------------|
| Terbutryne                      |
| Terfenadine                     |
| Terfenadine, hydroxy metabolite |
| Terfenadone                     |
| Terfenadone 1                   |
| Terfenadone 17                  |
| Terfenadone 2                   |
| Terfenadone 3                   |
| Terfenadone 4                   |
| Terfenadone 5                   |
| Terfenadone 6                   |
| Tergitol NP-10, Nonoxynol       |
| Terguride                       |
| Territrem A                     |
| Territrem A                     |
| Territrem B                     |
| Territrem C                     |
| Tesmiflifen, DPPE               |
| Testosterone                    |
| Testosterone, 16alpha-hydroxy   |

|                                                                        |
|------------------------------------------------------------------------|
| Tetradecanoic acid, Myristic acid                                      |
| Tetradecylphenyltetrahydropyridine 19                                  |
| Tetrahydrocannabinol THC 11-oxo-delta8-                                |
| Tetrahydrocannabinol THC 7alpha-hydroxy-delta8-; 7beta-hydroxy-delta8- |
| Tetrahydrocannabinol THC delta8-                                       |
| Tetrahydrocannabinol THC delta9-                                       |
| Teucrin A                                                              |
| TG100435                                                               |
| Thalidomide                                                            |
| Thalidomide C5-hydroxy                                                 |
| Theobromine, 3,7-Dimethylxanthine                                      |
| Theophylline, 1,3-Dimethylxanthine                                     |
| Thiabendazole                                                          |
| Thiacetazone                                                           |
| Thiamylal (S)- and (R)-                                                |
| Thioacetamide                                                          |
| Thiobenzamide                                                          |
| Thiocoraline                                                           |
| Thioridazine                                                           |
| Thiourea                                                               |

|                                          |
|------------------------------------------|
| Tiagabine                                |
| Tibolone                                 |
| Tibolone 3alpha-hydroxy; 3beta-hydroxy   |
| Ticlopidine                              |
| Tienilic acid                            |
| Timolol                                  |
| Tinidazole                               |
| Tipranavir                               |
| Tiracizine                               |
| Tirilazad                                |
| Tizanidine                               |
| Tocol                                    |
| Tofisopam; (R)-; (S)-                    |
| Tofisopam (R)- ; (S)-C4'-O-desmethyl, M3 |
| Tofisopam (R)-; (S)-C7-O-desmethyl, M1   |
| Tolbutamide                              |
| Tolcapone acetylamine                    |
| Tolcapone amine                          |
| Tolmetin                                 |
| Tolperisone                              |

|                                                                      |
|----------------------------------------------------------------------|
| Tolterodine                                                          |
| Toluene                                                              |
| Torasemide, Torsemide                                                |
| TPA023                                                               |
| TR-14035                                                             |
| Tramadol, rac., cis-                                                 |
| trans-(+)-DB[a,l]P-(11S,12S)-diol, trans-(-)-DB[a,l]P-(11R,12R)-diol |
| trans-(+,-), -(+)-, -(-)-B[a]P-7,8-dihydrodiol                       |
| trans-(+,-)-B[a]P-4,5-dihydrodiol                                    |
| trans-1,2-Dihydro-1,2-dihydroxy-6-nitrochrysene                      |
| trans-12-MBA-3,4-diol                                                |
| trans-2,3-Dihydroxy-2,3-dihydrofluoranthene                          |
| trans-5,6-Dimethylchrysene-1,2-diol                                  |
| trans-5-Methylchrysene-1,2-diol                                      |
| trans-5-Methylchrysene-7,8-diol                                      |
| trans-6-Aminochrysene-1,2-diol                                       |
| trans-7,12-DMBA-3,4-diol                                             |
| trans-7-MBA-3,4-diol                                                 |
| trans-B[b]F-9,10-diol                                                |
| trans-B[c]P-3,4-diol                                                 |

|                                                    |
|----------------------------------------------------|
| trans-B[g]C-11,12-diol                             |
| trans-B[j]F-4,5-diol                               |
| trans-Benz[a]anthracene-1,2-diol                   |
| trans-Benz[a]anthracene-3,4-diol                   |
| trans-Benz[a]anthracene-5,6-diol                   |
| trans-Benz[a]anthracene-8,9-diol                   |
| trans-Bromuconazole                                |
| trans-Chrysene-1,2-diol                            |
| trans-DB[a,l]P-11,12-diol                          |
| trans-Phenylpropene                                |
| trans-Resveratrol, trans-3,4',5-Trihydroxystilbene |
| trans-Stilbene                                     |
| Traxoprodil                                        |
| Trazodone                                          |
| Triacetyloleandomycin, Troleandomycin, TAO         |
| Triadimefon                                        |
| Triamterene                                        |
| Triazolam                                          |
| Triazolo[4,3alpha]pyridine 1                       |
| Trichloroethylene, TCE                             |

|                                      |
|--------------------------------------|
| Trifluoperazine                      |
| Trifluperidol                        |
| Triflupromazine                      |
| Trimethoprim                         |
| Trimethylamine                       |
| Trimipramine N-desmethyl             |
| Trimipramine rac, L-                 |
| tris-(2,3-Dibromopropyl)phosphate    |
| Triton N-101                         |
| Triton X-114                         |
| Trofosfamide                         |
| Troglitazone                         |
| Tropisetron                          |
| Tryptamine                           |
| Tyramine, m-                         |
| Tyramine, p-                         |
| U-89578, reduced tirilazad meabolite |
| Udenafil, DA-8159                    |
| UK-343,664                           |
| Undecylphenyltetrahydropyridine 18   |

|                                        |
|----------------------------------------|
| UO126                                  |
| Uroporphyrinogen                       |
| Ursodeoxycholate, Ursodeoxycholic acid |
| V102862                                |
| V10332                                 |
| V1113741                               |
| V11294                                 |
| V11689                                 |
| Vaccenic acid                          |
| Valdecoxib                             |
| Valproate, Valproic acid               |
| Valsartan                              |
| Valspodar, PSC-833, SDZ PSC 833        |
| Vanoxerine, GBR12909                   |
| Venlafaxine                            |
| Verapamil; (R)-; (S)-                  |
| Vesnarinone                            |
| Vicriviroc, SCH 417690                 |
| Vinblastine                            |
| Vincristine                            |

|                                |
|--------------------------------|
| Vindesine                      |
| Vinorelbine, Navelbine         |
| Vinyl bromide, Bromoethylene   |
| Vinyl carbamate                |
| Vinyl chloride, Chloroethylene |
| Vinylcyclohexane               |
| Vitamin D2, Calciferol         |
| Vitamin D3, Cholecalciferol    |
| VividBlue, BOMCC               |
| VividBlue, EOMCC               |
| VividCyan, BOMFC               |
| VividGreen, BOMF               |
| VividRed, OOMR                 |
| Voriconazole                   |
| V-PROLI-NO                     |
| V-PYRRO NO                     |
| Warfarin; (S)-; and (R)-       |
| Warfarin (S)-2-MeO             |
| Warfarin (S)-4-MeO             |
| WHI-P131, JANEX-1              |

|                                               |
|-----------------------------------------------|
| Xanomeline                                    |
| Xylene m-                                     |
| Xylene o-                                     |
| Xylene p-                                     |
| Y disopyramide                                |
| YM17E                                         |
| YM511                                         |
| YM796                                         |
| YM905                                         |
| YM992                                         |
| Yohimbine                                     |
| Z14(15)-Epoxyeicosatrienoic acid, Z14(15)-EET |
| Z8(9)-Epoxyeicosatrienoic acid, Z8(9)-EET     |
| Z9,10-Epoxyoctadecanoic acid, Z9(10)-EpSTA    |
| Zafirlukast                                   |
| Zaleplon                                      |
| Zaltoprofen                                   |
| Zatosetron, LY277359                          |
| ZD2249                                        |
| ZD6021                                        |

|                                    |
|------------------------------------|
| Zidovudine, Azidothymidine, AZT    |
| Zileuton N-dehydroxy, Abbott-66193 |
| Zileuton, ABT-077                  |
| Zimosterol                         |
| Zolmitriptan                       |
| Zolpidem                           |
| Zomepirac                          |
| Zopiclone                          |
| Zotarolimus                        |
| Zotepine                           |
| Zoxazolamine                       |
